# Supplementary material for: Association of prenatal antibiotics with measures of infant adiposity and the gut microbiome
Source: PubMed Central journal article supplement (PMC6587281; doi:10.1186/s12941-019-0318-9), 2019-06-21
Supplement: 12941_2019_318_MOESM2_ESM.pdf [file 12941_2019_318_MOESM2_ESM.pdf]

**Additional File 2**

**Table S1 Adjusted\* association (with 95% confidence interval) of prenatal antibiotics and infant skinfold thicknesses at 12 months**

|                                                                                  | Subscapular skinfold<br>thickness<br>(SS) | Triceps skinfold<br>thickness<br>(TR) | Abdominal<br>skinfold thickness | Overall adiposity<br>(SS+TR) | Central adiposity<br>(SS/TR) |
|----------------------------------------------------------------------------------|-------------------------------------------|---------------------------------------|---------------------------------|------------------------------|------------------------------|
| <b>N</b>                                                                         | 412                                       | 411                                   | 410                             | 411                          | 411                          |
| <b>Any prenatal antibiotic exposure</b>                                          |                                           |                                       |                                 |                              |                              |
| No                                                                               |                                           |                                       | Reference group                 |                              |                              |
| Yes                                                                              | 0.10 (-0.19, 0.39)                        | -0.02 (-0.41, 0.38)                   | 0.24 (-0.16, 0.65)              | 0.10 (-0.51, 0.71)           | 0.01 (-0.02, 0.04)           |
| <b>Number of courses during the prenatal period</b>                              |                                           |                                       |                                 |                              |                              |
| 0                                                                                |                                           |                                       | Reference group                 |                              |                              |
| 1                                                                                | -0.08 (-0.48, 0.32)                       | -0.29 (-0.84, 0.26)                   | 0.15 (-0.41, 0.71)              | -0.36 (-1.20, 0.49)          | 0.02 (-0.03, 0.06)           |
| 2                                                                                | 0.02 (-0.40, 0.43)                        | 0.07 (-0.50, 0.64)                    | -0.11 (-0.68, 0.47)             | 0.10 (-0.77, 0.98)           | -0.01 (-0.06, 0.04)          |
| ≥3                                                                               | 0.36 (-0.04, 0.76)                        | 0.18 (-0.37, 0.73)                    | 0.68 (0.12, 1.24)               | 0.56 (-0.29, 1.40)           | 0.02 (-0.02, 0.07)           |
| <b>Timing of prenatal antibiotic exposure</b>                                    |                                           |                                       |                                 |                              |                              |
| Reference group: Infants not exposed to antibiotics in each specific time period |                                           |                                       |                                 |                              |                              |
| First trimester                                                                  | 0.27 (-0.15, 0.69)                        | 0.15 (-0.42, 0.73)                    | 0.49 (-0.10, 1.08)              | 0.43 (-0.46, 1.32)           | 0.01 (-0.03, 0.06)           |
| Second trimester                                                                 | 0.50 (0.12, 0.89)                         | 0.16 (-0.38, 0.69)                    | 0.48 (-0.07, 1.03)              | 0.67 (-0.15, 1.49)           | 0.04 (-0.00, 0.09)           |
| Third trimester                                                                  | 0.09 (-0.22, 0.39)                        | -0.002 (-0.42, 0.42)                  | -0.03 (-0.46, 0.40)             | 0.10 (-0.55, 0.75)           | 0.001 (-0.03, 0.04)          |
| First year after delivery (maternal intake)                                      | -0.01 (-0.30, 0.29)                       | -0.08 (-0.50, 0.33)                   | 0.10 (-0.32, 0.52)              | -0.07 (-0.71, 0.56)          | 0.005 (-0.03, 0.04)          |

\* Adjusted for potential confounders including maternal age at delivery, race, marital status, educational, annual household income, smoke during pregnancy, and pre-pregnancy body mass index.
