# Supplementary material for: Association of prenatal antibiotics with measures of infant adiposity and the gut microbiome
Source: PubMed Central journal article supplement (PMC6587281; doi:10.1186/s12941-019-0318-9), 2019-06-21
Supplement: 12941_2019_318_MOESM3_ESM.pdf [file 12941_2019_318_MOESM3_ESM.pdf]

Additional File 3

Table S2 Associations of second trimester antibiotics and bacterial ASV (microbiota) abundance as shown in Figure 1

| Significant microbiota at 3 months  |      |                         |                 |                     |                    |                     |                  |               |
|-------------------------------------|------|-------------------------|-----------------|---------------------|--------------------|---------------------|------------------|---------------|
| Beta*                               | SE   | FDR-adjusted<br>P-value | Phylum          | Class               | Order              | Family              | Genus            | Species       |
| -6.63                               | 0.98 | < 0.001                 | Verrucomicrobia | Verrucomicrobiae    | Verrucomicrobiales | Verrucomicrobiaceae | Akkermansia      | muciniphila   |
| -2.75                               | 0.68 | < 0.001                 | Proteobacteria  | Gammaproteobacteria | Enterobacteriales  | Enterobacteriaceae  | NA               | NA            |
| -0.68                               | 0.30 | 0.049                   | Firmicutes      | Bacilli             | Lactobacillales    | Streptococcaceae    | Streptococcus    | NA            |
| 0.91                                | 0.40 | 0.050                   | Firmicutes      | Bacilli             | Lactobacillales    | Enterococcaceae     | Enterococcus     | NA            |
| -6.13                               | 0.82 | < 0.001                 | Bacteroidetes   | Bacteroidia         | Bacteroidales      | Bacteroidaceae      | Bacteroides      | NA            |
| 1.93                                | 0.84 | 0.044                   | Firmicutes      | Clostridia          | Clostridiales      | Lachnospiraceae     | Fusicatenibacter | NA            |
| -2.66                               | 0.81 | 0.003                   | Proteobacteria  | Gammaproteobacteria | Pasteurellales     | Pasteurellaceae     | NA               | NA            |
| -2.73                               | 1.16 | 0.040                   | Firmicutes      | Negativicutes       | Selenomonadales    | Veillonellaceae     | Veillonella      | NA            |
| -1.04                               | 0.39 | 0.017                   | Actinobacteria  | Actinobacteria      | Actinomycetales    | Actinomycetaceae    | Actinomyces      | odontolyticus |
| -4.59                               | 1.10 | < 0.001                 | Firmicutes      | Clostridia          | Clostridiales      | Clostridiaceae      | Clostridium      | neonatale     |
| -2.44                               | 0.55 | < 0.001                 | Firmicutes      | Bacilli             | Bacillales         | Staphylococcaceae   | Staphylococcus   | NA            |
| -3.91                               | 1.05 | 0.001                   | Firmicutes      | Negativicutes       | Selenomonadales    | Veillonellaceae     | Veillonella      | NA            |
| -2.41                               | 1.06 | 0.048                   | Firmicutes      | Bacilli             | Lactobacillales    | Lactobacillaceae    | Lactobacillus    | antri         |
| Significant microbiota at 12 months |      |                         |                 |                     |                    |                     |                  |               |
| Beta*                               | SE   | FDR-adjusted<br>P-value | Phylum          | Class               | Order              | Family              | Genus            | Species       |
| -1.83                               | 0.79 | 0.044                   | Proteobacteria  | Gammaproteobacteria | Enterobacteriales  | Enterobacteriaceae  | NA               | NA            |
| -3.96                               | 0.91 | < 0.001                 | Verrucomicrobia | Verrucomicrobiae    | Verrucomicrobiales | Verrucomicrobiaceae | Akkermansia      | NA            |
| 1.49                                | 0.58 | 0.023                   | Firmicutes      | Negativicutes       | Selenomonadales    | Veillonellaceae     | Veillonella      | NA            |
| -7.43                               | 1.16 | < 0.001                 | Bacteroidetes   | Bacteroidia         | Bacteroidales      | Bacteroidaceae      | Bacteroides      | NA            |

|       |      |         |               |               |                 |                       |                   |         |
|-------|------|---------|---------------|---------------|-----------------|-----------------------|-------------------|---------|
| -2.82 | 1.09 | 0.024   | Bacteroidetes | Bacteroidia   | Bacteroidales   | Rikenellaceae         | Alistipes         | NA      |
| -3.29 | 0.87 | 0.001   | Bacteroidetes | Bacteroidia   | Bacteroidales   | Bacteroidaceae        | Bacteroides       | NA      |
| -3.38 | 1.45 | 0.043   | Firmicutes    | Negativicutes | Selenomonadales | Veillonellaceae       | Veillonella       | NA      |
| -1.65 | 0.55 | 0.008   | Firmicutes    | Negativicutes | Selenomonadales | Veillonellaceae       | Veillonella       | rogosae |
| -6.61 | 1.16 | < 0.001 | Bacteroidetes | Bacteroidia   | Bacteroidales   | Bacteroidaceae        | Bacteroides       | NA      |
| 1.75  | 0.65 | 0.018   | Firmicutes    | Clostridia    | Clostridiales   | Peptostreptococcaceae | NA                | NA      |
| -2.88 | 0.87 | 0.003   | Firmicutes    | Clostridia    | Clostridiales   | Peptostreptococcaceae | NA                | NA      |
| 2.14  | 0.88 | 0.034   | Firmicutes    | Clostridia    | Clostridiales   | Clostridiaceae        | Clostridium       | NA      |
| -3.94 | 1.06 | 0.026   | Firmicutes    | Clostridia    | Clostridiales   | Lachnospiraceae       | Blautia           | NA      |
| -1.57 | 0.55 | 0.012   | Firmicutes    | Clostridia    | Clostridiales   | Ruminococcaceae       | Gemmiger          | NA      |
| -3.17 | 0.94 | 0.003   | Firmicutes    | Clostridia    | Clostridiales   | Clostridiaceae        | Clostridium       | NA      |
| 4.43  | 1.09 | < 0.001 | Firmicutes    | Clostridia    | Clostridiales   | Lachnospiraceae       | NA                | NA      |
| -2.23 | 0.58 | 0.001   | Firmicutes    | Clostridia    | Clostridiales   | Lachnospiraceae       | Lachnoclostridium | indolis |

Abbreviations: ASV, amplicon sequence variant; SE, standard error; FDR, false discovery rate; NA, not available

\* Negative beta coefficients indicate higher ASV relative abundance in infants not exposed to antibiotics in the second trimester, whereas positive beta coefficients indicate higher relative abundance in infants exposed to antibiotics in the second trimester.
